# Supplementary material
Source: PubMed Central journal article supplement (PMC2042208)

R#6

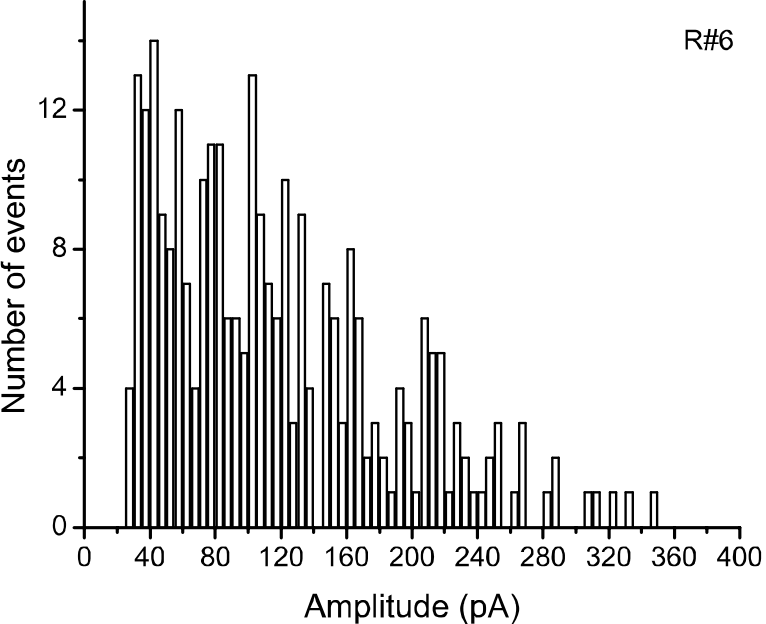

Supplement: pnas_0705756104_1.pdf [file pnas_0705756104_1.pdf]
